# Supplementary material for: Enhancing the Photovoltaic Properties via Incorporation of Selenophene Units in Organic Chromophores with A2-π2-A1-π1-A2 Configuration: A DFT-Based Exploration
Source: MDPI journal article supplement (doi:10.3390/polym15061508), 2023-03-17
Supplement: s1 [file s1]

# Enhancing the Photovoltaic Properties *via* Incorporation of Selenophene Units in Organic Chromophores with $A_2-\pi_2-A_1-\pi_1-A_2$ Configuration: A DFT-Based Exploration

Muhammad Nadeem Arshad, Iqra Shafiq, Muhammad Khalid, Mohammad Asad, Abdullah M. Asiri, Maha M. Alotaibi, Ataulpa A. C. Braga, A nish Khan and Khalid A. Alamry

**Table S1:** Cartesian coordinates of D1

| Atom | X-axis   | Y-axis   | Z-axis   |
|------|----------|----------|----------|
| C    | 1.867896 | -2.07665 | -0.41486 |
| C    | 0.619812 | -1.5064  | -0.39757 |
| C    | 0.393971 | -0.12583 | -0.31853 |
| C    | 1.552774 | 0.66114  | -0.24653 |
| C    | 2.800563 | 0.089609 | -0.26683 |
| C    | 3.027035 | -1.28881 | -0.35394 |
| C    | 4.347388 | -1.89236 | -0.37799 |
| C    | 4.625927 | -3.23486 | -0.54065 |
| C    | 5.983113 | -3.57825 | -0.54866 |
| H    | 3.852513 | -3.97846 | -0.67419 |
| C    | 6.872454 | -2.53849 | -0.35462 |
| C    | -0.9231  | 0.48594  | -0.31584 |
| C    | -1.19612 | 1.842971 | -0.39035 |
| S    | -2.40123 | -0.44938 | -0.18672 |
| C    | -2.56509 | 2.124423 | -0.33907 |
| H    | -0.42495 | 2.593731 | -0.48704 |
| C    | -3.33774 | 0.981038 | -0.22566 |
| C    | -4.71313 | 1.35757  | -0.18359 |
| C    | -4.80512 | 2.742909 | -0.27757 |
| C    | -6.12303 | 3.187056 | -0.27145 |
| C    | -7.04625 | 2.149119 | -0.13912 |
| H    | -6.4402  | 4.218204 | -0.35495 |
| C    | -3.42771 | 3.372401 | -0.38139 |
| C    | -3.14076 | 4.291489 | 0.814609 |
| H    | -2.1175  | 4.669732 | 0.764646 |
| H    | -3.82018 | 5.146213 | 0.806535 |
| H    | -3.26747 | 3.758099 | 1.75801  |
| C    | -3.25345 | 4.13122  | -1.70423 |
| H    | -3.93641 | 4.982252 | -1.7453  |

---

|   |          |          |          |
|---|----------|----------|----------|
| H | -2.23322 | 4.510655 | -1.79192 |
| H | -3.45625 | 3.482973 | -2.55828 |
| F | -0.43872 | -2.33386 | -0.45769 |
| F | 3.859858 | 0.916218 | -0.19267 |
| H | 1.923695 | -3.1542  | -0.47354 |
| H | 1.496375 | 1.737018 | -0.16404 |
| C | 8.287547 | -2.69129 | -0.42874 |
| C | 9.324208 | -1.86784 | -0.13117 |
| H | 8.603686 | -3.616   | -0.91046 |
| C | -8.45076 | 2.32535  | -0.19161 |
| C | -9.50681 | 1.489811 | 0.017401 |
| H | -8.75115 | 3.300051 | -0.57345 |
| C | 10.60363 | 0.092736 | 0.001787 |
| C | 11.3414  | -0.84166 | -0.69087 |
| C | -10.8441 | -0.43802 | -0.01101 |
| C | -11.5523 | 0.571557 | -0.62128 |
| C | -10.8163 | 1.843072 | -0.60281 |
| C | 10.64883 | -2.13347 | -0.77287 |
| C | 9.444393 | -0.59586 | 0.578863 |
| C | -9.65833 | 0.166943 | 0.611083 |
| C | 8.793867 | -0.2986  | 1.750571 |
| C | -9.00649 | -0.25545 | 1.745179 |
| O | 11.02253 | -3.15767 | -1.29517 |
| O | -11.1602 | 2.916262 | -1.04421 |
| C | -9.25673 | -1.48251 | 2.412926 |
| N | -9.41537 | -2.45833 | 3.009578 |
| C | -8.14479 | 0.609659 | 2.474337 |
| N | -7.48349 | 1.295554 | 3.126384 |
| C | 7.955847 | -1.2465  | 2.401304 |
| N | 7.313353 | -2.00184 | 2.992127 |
| C | 9.026727 | 0.866795 | 2.527855 |
| N | 9.175013 | 1.786679 | 3.209416 |
| S | -6.23516 | 0.592978 | -0.06901 |
| S | 12.81375 | -0.26506 | -1.32946 |
| S | -13.0455 | 0.098172 | -1.29639 |
| C | -11.9293 | -4.07693 | -0.05019 |
| C | -11.102  | -3.00762 | 0.226294 |
| C | -11.5023 | -1.70914 | -0.12816 |
| C | -12.7377 | -1.55421 | -0.80965 |

---

|    |          |          |          |
|----|----------|----------|----------|
| C  | -13.5745 | -2.63341 | -1.07961 |
| C  | -13.1626 | -3.8934  | -0.68817 |
| H  | -11.6167 | -5.07546 | 0.228323 |
| H  | -10.1526 | -3.17576 | 0.711158 |
| H  | -14.5162 | -2.48935 | -1.59354 |
| H  | -13.7955 | -4.74841 | -0.89084 |
| C  | 12.45349 | 1.331806 | -0.7107  |
| C  | 13.25176 | 2.457109 | -0.89527 |
| C  | 12.79939 | 3.666305 | -0.40147 |
| C  | 11.56458 | 3.756032 | 0.253849 |
| C  | 10.77557 | 2.640465 | 0.445742 |
| C  | 11.21809 | 1.390032 | -0.01478 |
| H  | 14.19468 | 2.387888 | -1.42221 |
| H  | 13.40164 | 4.556064 | -0.53649 |
| H  | 11.22083 | 4.717676 | 0.613403 |
| H  | 9.82386  | 2.735534 | 0.945938 |
| Se | 5.93929  | -0.91758 | -0.1928  |
| H  | 6.326554 | -4.59474 | -0.69554 |

**Table S2:** Cartesian coordinates of **D2**.

| Atom | X-axis   | Y-axis   | Z-axis   |
|------|----------|----------|----------|
| C    | -0.29484 | -0.79118 | -0.32523 |
| C    | -1.61975 | -0.43204 | -0.32043 |
| C    | -2.06951 | 0.894012 | -0.35246 |
| C    | -1.05439 | 1.861389 | -0.38348 |
| C    | 0.26998  | 1.500771 | -0.39119 |
| C    | 0.72067  | 0.175945 | -0.36508 |
| C    | 2.122357 | -0.20276 | -0.37476 |
| C    | 2.623252 | -1.48584 | -0.39053 |
| C    | 4.02269  | -1.60464 | -0.39208 |
| H    | 1.985598 | -2.35928 | -0.4046  |
| C    | 4.725146 | -0.4211  | -0.37774 |
| C    | -3.46947 | 1.281922 | -0.3611  |
| C    | -3.96299 | 2.565732 | -0.53251 |
| S    | -4.77191 | 0.131919 | -0.12015 |
| C    | -5.35905 | 2.623849 | -0.46629 |
| H    | -3.32735 | 3.42207  | -0.70666 |
| C    | -5.93197 | 1.383235 | -0.24465 |

---

|   |          |          |          |
|---|----------|----------|----------|
| C | -7.34947 | 1.53366  | -0.19433 |
| C | -7.66917 | 2.873976 | -0.39144 |
| C | -9.04146 | 3.097293 | -0.38297 |
| C | -9.78061 | 1.937036 | -0.14655 |
| H | -9.52458 | 4.053375 | -0.53615 |
| C | -6.41497 | 3.70797  | -0.58082 |
| C | -6.26495 | 4.754497 | 0.532549 |
| H | -5.31786 | 5.287598 | 0.425805 |
| H | -7.07458 | 5.485049 | 0.477069 |
| H | -6.28958 | 4.285276 | 1.517344 |
| C | -6.38638 | 4.376232 | -1.96233 |
| H | -7.19989 | 5.099357 | -2.04997 |
| H | -5.44329 | 4.907434 | -2.10694 |
| H | -6.49283 | 3.637173 | -2.75808 |
| F | -2.52807 | -1.42382 | -0.28014 |
| F | 1.179755 | 2.493765 | -0.41934 |
| H | -0.06442 | -1.84659 | -0.29616 |
| H | -1.28508 | 2.916992 | -0.39392 |
| C | -11.195  | 1.878163 | -0.17355 |
| C | -12.0968 | 0.899823 | 0.123562 |
| H | -11.657  | 2.759328 | -0.61651 |
| C | -13.0982 | -1.21734 | 0.270563 |
| C | -13.9715 | -0.38612 | -0.39225 |
| C | -13.4546 | 0.986294 | -0.48599 |
| C | -12.0193 | -0.38092 | 0.814912 |
| C | -11.2892 | -0.60369 | 1.958357 |
| O | -13.9773 | 1.951914 | -0.99536 |
| C | -11.3181 | -1.80238 | 2.717512 |
| N | -11.2997 | -2.7442  | 3.385449 |
| C | -10.575  | 0.444975 | 2.600954 |
| N | -10.0298 | 1.278459 | 3.184892 |
| S | -8.72378 | 0.543922 | 0.01993  |
| S | -15.3759 | -1.14633 | -0.99148 |
| C | -13.5713 | -4.97694 | 0.52446  |
| C | -12.9272 | -3.76933 | 0.70091  |
| C | -13.54   | -2.58395 | 0.263564 |
| C | -14.7934 | -2.68461 | -0.39482 |
| C | -15.4452 | -3.90296 | -0.56398 |
| C | -14.8266 | -5.04576 | -0.09304 |

---

|    |          |          |          |
|----|----------|----------|----------|
| H  | -13.095  | -5.88714 | 0.866546 |
| H  | -11.9565 | -3.74338 | 1.171808 |
| H  | -16.4045 | -3.9532  | -1.06262 |
| H  | -15.3131 | -6.00531 | -0.21677 |
| Se | 3.53726  | 1.03473  | -0.36166 |
| H  | 4.513034 | -2.5706  | -0.40654 |
| C  | 6.145281 | -0.23236 | -0.37637 |
| C  | 6.842175 | 0.965177 | -0.38825 |
| C  | 8.235956 | 0.872079 | -0.38023 |
| H  | 6.334654 | 1.922013 | -0.40846 |
| C  | 8.752457 | -0.41384 | -0.35868 |
| H  | 8.889246 | 1.731737 | -0.39105 |
| Se | 7.338632 | -1.66968 | -0.35844 |
| C  | 10.07385 | -0.93421 | -0.36598 |
| C  | 11.30353 | -0.34494 | -0.25168 |
| H  | 10.09971 | -2.01506 | -0.44406 |
| C  | 12.58032 | -1.07451 | -0.27184 |
| C  | 11.61857 | 1.070518 | 0.068818 |
| C  | 15.32471 | 1.05524  | 1.279755 |
| C  | 14.9265  | -0.24536 | 0.871892 |
| C  | 15.81806 | -1.30451 | 1.107217 |
| C  | 17.05424 | -1.05042 | 1.666371 |
| C  | 17.44017 | 0.249108 | 2.015549 |
| C  | 16.57555 | 1.311734 | 1.833352 |
| H  | 15.54591 | -2.31808 | 0.859508 |
| H  | 17.73506 | -1.874   | 1.841175 |
| H  | 18.41744 | 0.423185 | 2.448255 |
| H  | 16.85568 | 2.315399 | 2.126305 |
| C  | 13.0334  | 1.049045 | 0.454163 |
| C  | 13.5831  | -0.20577 | 0.354235 |
| S  | 14.06788 | 2.254072 | 1.067667 |
| O  | 10.89557 | 2.044823 | 0.057956 |
| C  | 12.81212 | -2.26272 | -0.92314 |
| C  | 11.80839 | -2.97528 | -1.63788 |
| N  | 11.04332 | -3.59553 | -2.24121 |
| C  | 14.091   | -2.85748 | -1.08749 |
| N  | 15.09451 | -3.39107 | -1.29173 |

**Table S3:** Cartesian coordinates of **D3**.

| Atom | X-axis   | Y-axis   | Z-axis   |
|------|----------|----------|----------|
| C    | 2.241293 | -0.89414 | -0.03166 |
| C    | 3.556343 | -0.50419 | 0.022683 |
| C    | 3.972409 | 0.827252 | 0.147051 |
| C    | 2.931842 | 1.765666 | 0.213061 |
| C    | 1.617172 | 1.374155 | 0.160727 |
| C    | 1.200329 | 0.043898 | 0.034686 |
| C    | -0.19032 | -0.36825 | -0.03026 |
| C    | -0.65621 | -1.65235 | -0.19584 |
| C    | -2.0536  | -1.80808 | -0.2279  |
| H    | 0.005225 | -2.50119 | -0.30602 |
| C    | -2.78849 | -0.65403 | -0.08968 |
| C    | 5.362123 | 1.246189 | 0.212121 |
| C    | 5.822411 | 2.536441 | 0.424199 |
| S    | 6.696816 | 0.127276 | 0.001745 |
| C    | 7.218693 | 2.623372 | 0.413907 |
| H    | 5.163523 | 3.377781 | 0.584444 |
| C    | 7.825125 | 1.398516 | 0.194427 |
| C    | 9.239689 | 1.577518 | 0.200255 |
| C    | 9.524788 | 2.92053  | 0.43089  |
| C    | 10.89141 | 3.170141 | 0.477948 |
| C    | 11.66242 | 2.028278 | 0.251819 |
| H    | 11.34977 | 4.132418 | 0.664644 |
| C    | 8.247339 | 3.726201 | 0.585752 |
| C    | 8.118231 | 4.78824  | -0.51541 |
| H    | 7.157098 | 5.300655 | -0.4365  |
| H    | 8.91011  | 5.533632 | -0.41717 |
| H    | 8.189769 | 4.336361 | -1.50602 |
| C    | 8.152679 | 4.370238 | 1.975825 |
| H    | 8.94644  | 5.108747 | 2.105967 |
| H    | 7.193462 | 4.878842 | 2.093354 |
| H    | 8.245176 | 3.620099 | 2.762909 |
| F    | 4.489424 | -1.47151 | -0.04846 |
| F    | 0.682065 | 2.341835 | 0.231983 |
| H    | 2.038534 | -1.95156 | -0.12412 |
| H    | 3.134416 | 2.823428 | 0.300819 |
| C    | 13.07498 | 1.997606 | 0.334034 |
| C    | 14.00877 | 1.040813 | 0.065106 |
| H    | 13.50022 | 2.883629 | 0.803382 |
| C    | 15.0595  | -1.05375 | -0.05938 |

---

|    |          |          |          |
|----|----------|----------|----------|
| C  | 15.88734 | -0.21149 | 0.646121 |
| C  | 15.33797 | 1.149028 | 0.731148 |
| C  | 13.98665 | -0.23402 | -0.64027 |
| C  | 13.30927 | -0.46096 | -1.81507 |
| O  | 15.81898 | 2.119822 | 1.271054 |
| C  | 13.39635 | -1.6509  | -2.58347 |
| N  | 13.42665 | -2.586   | -3.26038 |
| C  | 12.60071 | 0.57889  | -2.47776 |
| N  | 12.06293 | 1.406625 | -3.07665 |
| S  | 10.64017 | 0.617832 | 0.022842 |
| S  | 17.2814  | -0.94889 | 1.296157 |
| C  | 15.61848 | -4.80062 | -0.32519 |
| C  | 14.95807 | -3.6044  | -0.51802 |
| C  | 15.52837 | -2.41121 | -0.04586 |
| C  | 16.75549 | -2.49299 | 0.662806 |
| C  | 17.42408 | -3.69978 | 0.848507 |
| C  | 16.84851 | -4.85024 | 0.342986 |
| H  | 15.17509 | -5.71691 | -0.69421 |
| H  | 14.00721 | -3.59337 | -1.0284  |
| H  | 18.363   | -3.73581 | 1.385838 |
| H  | 17.34866 | -5.80107 | 0.478743 |
| Se | -1.64253 | 0.821135 | 0.112691 |
| H  | -2.51784 | -2.77637 | -0.37104 |
| C  | -4.21513 | -0.50434 | -0.08726 |
| C  | -4.95464 | 0.654143 | -0.17202 |
| C  | -6.35099 | 0.495184 | -0.15048 |
| H  | -4.48937 | 1.627252 | -0.27036 |
| C  | -6.81141 | -0.79835 | -0.04795 |
| H  | -7.02443 | 1.340038 | -0.22961 |
| Se | -5.35595 | -1.99288 | 0.05205  |
| C  | -8.1649  | -1.25977 | -0.01258 |
| C  | -8.60501 | -2.57271 | -0.05788 |
| C  | -9.98763 | -2.73412 | -0.00978 |
| H  | -7.92657 | -3.41335 | -0.13531 |
| C  | -10.7507 | -1.57363 | 0.075884 |
| H  | -10.4622 | -3.70766 | -0.03706 |
| Se | -9.61252 | -0.06639 | 0.110441 |
| C  | -12.1628 | -1.65198 | 0.140531 |
| C  | -13.1558 | -0.71247 | 0.189704 |

---

|   |          |          |          |
|---|----------|----------|----------|
| H | -12.4879 | -2.68596 | 0.119141 |
| C | -16.4951 | 2.245232 | -0.55457 |
| C | -16.5643 | 0.833041 | -0.4189  |
| C | -17.7921 | 0.21249  | -0.70257 |
| C | -18.8881 | 0.979066 | -1.04345 |
| C | -18.8033 | 2.374126 | -1.12222 |
| C | -17.6038 | 3.018268 | -0.8869  |
| H | -17.8892 | -0.86037 | -0.6619  |
| H | -19.8296 | 0.489071 | -1.25762 |
| H | -19.679  | 2.95368  | -1.38664 |
| H | -17.5215 | 4.094074 | -0.97328 |
| C | -12.9643 | 0.74652  | 0.117565 |
| C | -14.6003 | -0.96329 | 0.239272 |
| C | -14.3099 | 1.29649  | -0.05377 |
| C | -15.2649 | 0.308577 | -0.08284 |
| S | -14.8803 | 2.877106 | -0.32557 |
| O | -11.9202 | 1.369287 | 0.160886 |
| C | -15.2076 | -2.12125 | 0.66597  |
| C | -14.4925 | -3.28988 | 1.049721 |
| N | -13.9706 | -4.2673  | 1.376111 |
| C | -16.5998 | -2.26555 | 0.903476 |
| N | -17.7103 | -2.45944 | 1.154391 |

**Table S4:** Cartesian coordinates of **D5**.

| Atom | X-axis   | Y-axis   | Z-axis   |
|------|----------|----------|----------|
| C    | -6.2279  | -0.51375 | 0.651398 |
| C    | -7.55628 | -0.18756 | 0.53432  |
| C    | -8.01862 | 1.072745 | 0.136412 |
| C    | -7.01245 | 2.006074 | -0.15252 |
| C    | -5.68449 | 1.679344 | -0.03216 |
| C    | -5.22047 | 0.422056 | 0.37201  |
| C    | -3.81569 | 0.0774   | 0.497669 |
| C    | -3.30248 | -1.13252 | 0.902708 |
| C    | -1.89926 | -1.22976 | 0.95361  |
| H    | -3.93243 | -1.96769 | 1.178522 |
| C    | -1.20695 | -0.09859 | 0.591901 |
| C    | -9.42249 | 1.431806 | 0.028405 |
| C    | -9.93017 | 2.703913 | -0.18295 |



---

|   |          |          |          |
|---|----------|----------|----------|
| S | -10.7107 | 0.245928 | 0.126698 |
| C | -11.3265 | 2.722776 | -0.27198 |
| H | -9.30422 | 3.581736 | -0.25704 |
| C | -11.8851 | 1.464656 | -0.12647 |
| C | -13.304  | 1.578586 | -0.21188 |
| C | -13.6389 | 2.913229 | -0.42438 |
| C | -15.0104 | 3.100686 | -0.5502  |
| C | -15.7382 | 1.91827  | -0.40251 |
| H | -15.5023 | 4.04602  | -0.73823 |
| C | -12.3946 | 3.781369 | -0.47686 |
| C | -12.3841 | 4.814328 | 0.658841 |
| H | -11.4454 | 5.372255 | 0.654658 |
| H | -13.203  | 5.525373 | 0.531239 |
| H | -12.4951 | 4.329846 | 1.63021  |
| C | -12.2455 | 4.470981 | -1.84013 |
| H | -13.0636 | 5.176421 | -1.99955 |
| H | -11.3056 | 5.025519 | -1.88318 |
| H | -12.2541 | 3.741601 | -2.65175 |
| F | -8.45523 | -1.14719 | 0.821739 |
| F | -4.78437 | 2.636445 | -0.3329  |
| H | -5.98726 | -1.51845 | 0.968595 |
| H | -7.25394 | 3.004566 | -0.48806 |
| C | -17.1403 | 1.825298 | -0.56863 |
| C | -18.0413 | 0.818908 | -0.37988 |
| H | -17.5794 | 2.704172 | -1.03854 |
| C | -18.9965 | -1.32438 | -0.36975 |
| C | -19.8228 | -0.50162 | -1.09951 |
| C | -19.3341 | 0.884478 | -1.11875 |
| C | -17.9985 | -0.4727  | 0.292949 |
| C | -17.3802 | -0.70138 | 1.49963  |
| O | -19.8293 | 1.846829 | -1.6611  |
| C | -17.455  | -1.9155  | 2.230557 |
| N | -17.4803 | -2.86992 | 2.880173 |
| C | -16.7619 | 0.350964 | 2.229544 |
| N | -16.3006 | 1.18568  | 2.880251 |
| S | -14.6653 | 0.550148 | -0.14944 |
| S | -21.1419 | -1.28414 | -1.84625 |
| C | -19.3886 | -5.09906 | -0.23316 |
| C | -18.7978 | -3.87946 | 0.027116 |

---

---

|    |            |          |          |
|----|------------|----------|----------|
| C  | -19.3983   | -2.70112 | -0.44495 |
| C  | -20.5791   | -2.81951 | -1.22353 |
| C  | -21.1781   | -4.05022 | -1.47726 |
| C  | -20.5768   | -5.1866  | -0.96982 |
| H  | -18.9226   | -6.00394 | 0.13608  |
| H  | -17.8774   | -3.83859 | 0.589334 |
| H  | -22.0835   | -4.11444 | -2.06703 |
| H  | -21.0228   | -6.15535 | -1.1575  |
| Se | -2.4057570 | 1.26679  | 0.114049 |
| H  | -1.39968   | -2.135   | 1.276948 |
| C  | 0.213875   | 0.100719 | 0.546749 |
| C  | 0.912521   | 1.279539 | 0.446032 |
| C  | 2.317271   | 1.16664  | 0.432328 |
| H  | 0.414305   | 2.240658 | 0.405689 |
| C  | 2.820721   | -0.10887 | 0.521438 |
| H  | 2.961825   | 2.035925 | 0.379921 |
| Se | 1.40945400 | -1.35406 | 0.614204 |
| C  | 4.190848   | -0.53112 | 0.539086 |
| C  | 4.704553   | -1.76562 | 0.859601 |
| C  | 6.105951   | -1.88734 | 0.793563 |
| H  | 4.071146   | -2.58845 | 1.168096 |
| C  | 6.79297    | -0.7579  | 0.41666  |
| H  | 6.61337    | -2.80991 | 1.048811 |
| Se | 5.58425000 | 0.647082 | 0.072705 |
| C  | 8.206942   | -0.57787 | 0.272748 |
| C  | 8.909432   | 0.597658 | 0.122432 |
| C  | 10.3037    | 0.469816 | 0.006745 |
| H  | 8.41876    | 1.563228 | 0.112748 |
| C  | 10.80175   | -0.81322 | 0.055618 |
| H  | 10.94907   | 1.332763 | -0.10467 |
| C  | 12.16342   | -1.24081 | -0.02552 |
| C  | 12.64006   | -2.54068 | 0.039723 |
| C  | 14.02256   | -2.66943 | -0.06415 |
| H  | 11.98738   | -3.39632 | 0.161547 |
| C  | 14.75171   | -1.49365 | -0.21633 |
| H  | 14.52229   | -3.63017 | -0.03296 |
| C  | 16.16087   | -1.53886 | -0.33782 |
| C  | 17.12701   | -0.57645 | -0.45173 |
| H  | 16.51357   | -2.56333 | -0.30104 |

---

|    |             |          |          |
|----|-------------|----------|----------|
| C  | 18.57413    | -0.79262 | -0.55094 |
| C  | 16.90064    | 0.878442 | -0.41098 |
| C  | 20.41462    | 2.483381 | 0.079756 |
| C  | 20.51497    | 1.070021 | -0.01965 |
| C  | 21.76812    | 0.488287 | 0.233535 |
| C  | 22.85623    | 1.291122 | 0.510538 |
| C  | 22.73864    | 2.685378 | 0.553918 |
| C  | 21.5148     | 3.292763 | 0.347474 |
| H  | 21.89106    | -0.5826  | 0.218934 |
| H  | 23.81746    | 0.830828 | 0.701703 |
| H  | 23.60852    | 3.2936   | 0.768233 |
| H  | 21.40799    | 4.368252 | 0.407356 |
| C  | 18.23718    | 1.466693 | -0.30914 |
| C  | 19.21783    | 0.504169 | -0.2905  |
| S  | 18.77643    | 3.068105 | -0.10333 |
| O  | 15.83981    | 1.473789 | -0.42802 |
| C  | 19.19517    | -1.94695 | -0.96822 |
| C  | 18.49724    | -3.1444  | -1.28962 |
| N  | 17.98955    | -4.14429 | -1.56666 |
| C  | 20.58034    | -2.06202 | -1.25689 |
| N  | 21.68498    | -2.23431 | -1.54653 |
| Se | 9.38573800  | -2.04349 | 0.259214 |
| Se | 13.57457600 | -0.01584 | -0.2395  |

**Table S5:** Cartesian coordinates of **D7**.

| Atom | X-axis   | Y-axis   | Z-axis   |
|------|----------|----------|----------|
| C    | 10.21363 | 0.596513 | 0.029693 |
| C    | 11.54017 | 0.268113 | -0.10151 |
| C    | 12.01557 | -1.04706 | -0.16807 |
| C    | 11.02663 | -2.03762 | -0.08196 |
| C    | 9.700084 | -1.70761 | 0.045595 |
| C    | 9.222111 | -0.39339 | 0.108079 |
| C    | 7.819298 | -0.04607 | 0.247082 |
| C    | 7.292269 | 1.222186 | 0.31663  |
| C    | 5.894287 | 1.310973 | 0.455769 |
| H    | 7.908759 | 2.110285 | 0.275676 |
| C    | 5.22014  | 0.114046 | 0.506626 |
| C    | 13.41537 | -1.40335 | -0.32656 |

---

|   |          |          |          |
|---|----------|----------|----------|
| C | 13.91337 | -2.66569 | -0.60685 |
| S | 14.7131  | -0.23933 | -0.13812 |
| C | 15.3113  | -2.69718 | -0.66198 |
| H | 13.27769 | -3.52323 | -0.77535 |
| C | 15.88045 | -1.45799 | -0.42389 |
| C | 17.29884 | -1.57941 | -0.50831 |
| C | 17.623   | -2.90014 | -0.80701 |
| C | 18.99374 | -3.09303 | -0.93282 |
| C | 19.73157 | -1.93109 | -0.69853 |
| H | 19.47774 | -4.0285  | -1.18118 |
| C | 16.37111 | -3.74996 | -0.92984 |
| C | 16.34061 | -4.85831 | 0.132189 |
| H | 15.39717 | -5.4059  | 0.080951 |
| H | 17.1546  | -5.56639 | -0.03626 |
| H | 16.44617 | -4.44271 | 1.135562 |
| C | 16.22819 | -4.34311 | -2.33831 |
| H | 17.04121 | -5.04402 | -2.53857 |
| H | 15.28385 | -4.88432 | -2.42739 |
| H | 16.25104 | -3.56005 | -3.09797 |
| F | 12.42385 | 1.281257 | -0.16851 |
| F | 8.816963 | -2.72299 | 0.122487 |
| H | 9.961103 | 1.646644 | 0.067512 |
| H | 11.28245 | -3.08752 | -0.10145 |
| C | 21.13578 | -1.83891 | -0.84664 |
| C | 22.0426  | -0.85773 | -0.57224 |
| H | 21.57195 | -2.68242 | -1.37982 |
| C | 23.01636 | 1.268518 | -0.37798 |
| C | 23.84116 | 0.50106  | -1.16723 |
| C | 23.34091 | -0.87428 | -1.30397 |
| C | 22.00452 | 0.374889 | 0.203641 |
| C | 21.37591 | 0.510008 | 1.419104 |
| O | 23.8326  | -1.7935  | -1.91944 |
| C | 21.45491 | 1.658661 | 2.248621 |
| N | 21.48246 | 2.555659 | 2.97541  |
| C | 20.7388  | -0.59156 | 2.053961 |
| N | 20.26118 | -1.47099 | 2.629752 |
| S | 18.66967 | -0.57242 | -0.3618  |
| S | 25.17305 | 1.330003 | -1.83735 |
| C | 23.44248 | 5.014966 | 0.074438 |

---

---

|    |          |          |          |
|----|----------|----------|----------|
| C  | 22.83852 | 3.783839 | 0.228708 |
| C  | 23.43132 | 2.642818 | -0.33575 |
| C  | 24.61915 | 2.813858 | -1.09368 |
| C  | 25.23124 | 4.055436 | -1.24058 |
| C  | 24.63663 | 5.151735 | -0.64476 |
| H  | 22.98217 | 5.890595 | 0.514582 |
| H  | 21.914   | 3.705604 | 0.780077 |
| H  | 26.14132 | 4.159319 | -1.81723 |
| H  | 25.09287 | 6.128328 | -0.74869 |
| Se | 6.430481 | -1.31508 | 0.3553   |
| H  | 5.386576 | 2.264657 | 0.535467 |
| C  | 3.808943 | -0.11044 | 0.643118 |
| C  | 3.151093 | -1.27864 | 0.942094 |
| C  | 1.745743 | -1.19624 | 1.017979 |
| H  | 3.681853 | -2.20357 | 1.133218 |
| C  | 1.201043 | 0.043235 | 0.78445  |
| H  | 1.133558 | -2.05337 | 1.271418 |
| Se | 2.565168 | 1.284293 | 0.397177 |
| C  | -0.17939 | 0.432551 | 0.797339 |
| C  | -0.71513 | 1.697236 | 0.828287 |
| C  | -2.12281 | 1.773036 | 0.840863 |
| H  | -0.0924  | 2.582882 | 0.867422 |
| C  | -2.79183 | 0.573202 | 0.820465 |
| H  | -2.64538 | 2.720813 | 0.890119 |
| Se | -1.55873 | -0.85104 | 0.754625 |
| C  | -4.20582 | 0.334124 | 0.8325   |
| C  | -4.87583 | -0.84293 | 1.065604 |
| C  | -6.28263 | -0.77383 | 1.018169 |
| H  | -4.35455 | -1.76392 | 1.29742  |
| C  | -6.81729 | 0.461921 | 0.744329 |
| H  | -6.90589 | -1.63859 | 1.211909 |
| C  | -8.19672 | 0.838061 | 0.639718 |
| C  | -8.74319 | 2.099739 | 0.618898 |
| C  | -10.1458 | 2.163373 | 0.511447 |
| H  | -8.13305 | 2.990677 | 0.70462  |
| C  | -10.8016 | 0.957277 | 0.439603 |
| H  | -10.6773 | 3.107483 | 0.508747 |
| Se | -5.43635 | 1.718497 | 0.484603 |
| Se | -9.55596 | -0.4571  | 0.488738 |

---

---

|    |          |          |          |
|----|----------|----------|----------|
| C  | -12.2084 | 0.709142 | 0.333487 |
| C  | -12.8789 | -0.48737 | 0.464143 |
| C  | -14.2739 | -0.43091 | 0.307017 |
| H  | -12.3641 | -1.41264 | 0.692272 |
| C  | -14.8045 | 0.811784 | 0.041416 |
| H  | -14.8964 | -1.31205 | 0.405316 |
| C  | -16.174  | 1.169261 | -0.15832 |
| C  | -16.6939 | 2.444903 | -0.31211 |
| C  | -18.0732 | 2.503178 | -0.49185 |
| H  | -16.0751 | 3.333436 | -0.28777 |
| C  | -18.7567 | 1.290515 | -0.49508 |
| H  | -18.6046 | 3.437784 | -0.6254  |
| C  | -20.1582 | 1.262452 | -0.68766 |
| H  | -20.5445 | 2.266534 | -0.82132 |
| C  | -21.0858 | 0.256342 | -0.70579 |
| C  | -20.8156 | -1.16662 | -0.43863 |
| C  | -22.5306 | 0.397014 | -0.91456 |
| C  | -22.1361 | -1.78801 | -0.32575 |
| C  | -23.1469 | -0.87436 | -0.50469 |
| C  | -23.1623 | 1.453752 | -1.52833 |
| C  | -24.4393 | -1.44884 | -0.2286  |
| C  | -25.7249 | -0.89025 | -0.13692 |
| C  | -26.801  | -1.68972 | 0.19179  |
| C  | -26.6402 | -3.05671 | 0.44679  |
| C  | -25.3862 | -3.63533 | 0.402961 |
| C  | -24.2988 | -2.82757 | 0.082989 |
| H  | -25.8829 | 0.160835 | -0.31668 |
| H  | -27.7872 | -1.24754 | 0.256945 |
| H  | -27.5011 | -3.66361 | 0.697652 |
| H  | -25.2476 | -4.68539 | 0.626225 |
| S  | -22.6341 | -3.3637  | 0.082142 |
| O  | -19.7371 | -1.71469 | -0.30942 |
| C  | -24.5294 | 1.468466 | -1.91038 |
| N  | -25.6184 | 1.551412 | -2.28593 |
| C  | -22.4866 | 2.62242  | -1.9776  |
| N  | -21.9972 | 3.594254 | -2.36535 |
| Se | -17.5328 | -0.12782 | -0.24751 |
| Se | -13.4237 | 2.094711 | -0.04333 |

---

**Table S6:** Calculated energies ( $E$ ) and energy gap ( $\Delta E$ ) for **D1-D7**.

| Compounds | $E_{LUMO+1}$ | $E_{HOMO-1}$ | $\Delta E$ (eV) | $E_{LUMO+2}$ | $E_{HOMO-2}$ | $\Delta E$ (eV) |
|-----------|--------------|--------------|-----------------|--------------|--------------|-----------------|
| <b>D1</b> | -3.178       | -6.606       | 3.428           | -3.032       | -6.914       | 3.882           |
| <b>D2</b> | -3.184       | -6.262       | 3.078           | -3.072       | -6.895       | 3.823           |
| <b>D3</b> | -3.204       | -6.056       | 2.852           | -3.064       | -6.762       | 3.698           |
| <b>D5</b> | -3.208       | -5.853       | 2.645           | -3.066       | -6.289       | 3.223           |
| <b>D7</b> | -3.209       | -5.719       | 2.510           | -3.065       | -6.021       | 2.956           |

$E$ = energy,  $\Delta E$ (eV)=  $E_{LUMO}-E_{HOMO}$ ; HOMO= highest occupied molecular orbital; LUMO= lowest unoccupied molecular orbital, MO, molecular orbital, Units in eV.

**Table S7:** Percentages of Acceptor 2,  $\pi$ -spacer 1,  $\pi$ -spacer 2 and Acceptor 1 for HOMOs and LUMOs

| Compound<br>ds | LUMO            |                 |               |               | HOMO            |                 |               |               |
|----------------|-----------------|-----------------|---------------|---------------|-----------------|-----------------|---------------|---------------|
|                | Accepto<br>r- 2 | Accepto<br>r- 1 | Spacer<br>- 2 | Spacer<br>- 1 | Accepto<br>r- 2 | Accepto<br>r- 1 | Spacer<br>- 2 | Spacer<br>- 1 |
| <b>D1</b>      | 60.0            | 9.8             | 15.0          | 15.3          | 22.4            | 14.1            | 54.8          | 8.7           |
| <b>D2</b>      | 53.4            | 7.1             | 12.7          | 26.9          | 18.5            | 14.7            | 42.2          | 24.6          |
| <b>D3</b>      | 59.1            | 3.8             | 7.2           | 30.0          | 14.1            | 13.0            | 27.6          | 45.3          |
| <b>D5</b>      | 61.8            | 1.0             | 2.1           | 35.1          | 7.4             | 7.2             | 10.6          | 74.8          |
| <b>D7</b>      | 64.0            | 0.2             | 0.4           | 35.5          | 3.7             | 4.2             | 4.8           | 87.3          |

**Table S8:** Wave length, excitation energy and oscillator strength of investigated compound **D1** in gas phase.

| NO | DFT<br>$\lambda$ (nm) | $E$ (eV) | $f$   | MO contributions                                                                                          |
|----|-----------------------|----------|-------|-----------------------------------------------------------------------------------------------------------|
| 1  | 596.393               | 2.078    | 1.872 | H→L (91%), H-1→L+1 (3%), H→L+1 (3%)                                                                       |
| 2  | 538.734               | 2.301    | 0.057 | H→L+1 (61%), H→L+2 (17%), H→L+3 (11%), H-1→L+2 (3%), H→L (4%)                                             |
| 3  | 507.508               | 2.443    | 0.380 | H→L+1 (24%), H→L+2 (57%), H-1→L+1 (5%), H-1→L+3 (2%), H→L+3 (6%)                                          |
| 4  | 467.988               | 2.649    | 0.091 | H-1→L (13%), H→L+2 (11%), H→L+3 (64%), H→L+1 (6%)                                                         |
| 5  | 439.613               | 2.820    | 0.057 | H-1→L (61%), H-1→L+1 (10%), H→L+3 (13%), H-4→L+1 (2%), H→L+2 (6%)                                         |
| 6  | 413.625               | 2.998    | 0.019 | H-1→L (18%), H-1→L+1 (45%), H-1→L+2 (12%), H-4→L+2 (2%), H-3→L (9%), H-3→L+1 (2%), H→L+1 (2%), H→L+2 (4%) |

**Table S9:** Wave length, excitation energy and oscillator strength of investigated compound **D2** in gas phase.

| NO | DFT<br>$\lambda$ (nm) | $E$ (eV) | $f$   | MO contributions                                                              |
|----|-----------------------|----------|-------|-------------------------------------------------------------------------------|
| 1  | 613.722               | 2.020    | 2.750 | H→L (90%), H-1→L+1 (4%), HOMO→L+1 (3%)                                        |
| 2  | 550.747               | 2.251    | 0.076 | H→L+1 (67%), H→L+3 (15%), H-1→L+2 (7%), H-1→L+3 (3%), H→L (3%)                |
| 3  | 533.977               | 2.322    | 0.265 | H→L+2 (66%), H-1→L+1 (7%), H-1→L+2 (6%), H-1→L+3 (4%), H→L+1 (4%), H→L+3 (9%) |
| 4  | 495.560               | 2.502    | 0.151 | H-1→L (15%), H→L+1 (17%), H→L+2 (11%), H→L+3 (50%),                           |
| 5  | 467.936               | 2.650    | 0.124 | H-1→L (78%), H→L+3 (14%), H→L+2 (5%)                                          |
| 6  | 446.581               | 2.776    | 0.024 | H-1→L+1 (58%), H-1→L+2 (14%), H→L+2 (14%), H→L+1 (3%)                         |

**Table S10:** Wave length, excitation energy and oscillator strength of investigated compound **D3** in gas phase.

| NO | DFT<br>$\lambda$ (nm) | $E$ (eV) | $f$   | MO contributions                                                         |
|----|-----------------------|----------|-------|--------------------------------------------------------------------------|
| 1  | 635.490               | 1.951    | 3.075 | H→L (88%), H-1→L+1 (6%), HOMO→L+1 (3%)                                   |
| 2  | 579.582               | 2.139    | 0.093 | H-1→L+2 (10%), H→L+1 (69%), H-1→L (4%), H→L (2%), H→L+2 (8%), H→L+3 (3%) |
| 3  | 554.367               | 2.237    | 0.284 | H→L+2 (62%), H→L+3 (13%), H-1→L+1 (7%), H-1→L+3 (9%), H→L+1 (4%)         |
| 4  | 517.269               | 2.397    | 0.096 | H-1→L (19%), H→L+1 (16%), H→L+2 (10%), H→L+3 (43%), H-1→L+3 (4%)         |
| 5  | 495.026               | 2.505    | 0.009 | H-1→L (72%), H→L+3 (18%), H-1→L+3 (2%), H→L+2 (4%)                       |
| 6  | 475.673               | 2.607    | 0.180 | H-1→L+1 (77%), H→L (6%), H→L+2 (8%), H→L+3 (3%)                          |

**Table S11:** Wave length, excitation energy and oscillator strength of investigated compound **D5** in gas phase.

| NO | DFT<br>$\lambda$ (nm) | $E$ (eV) | $f$   | MO contributions                                                                  |
|----|-----------------------|----------|-------|-----------------------------------------------------------------------------------|
| 1  | 668.702               | 1.854    | 3.524 | H→L (84%), H-1→L+1 (6%), H→L+1 (4%)                                               |
| 2  | 607.408               | 2.041    | 0.287 | H→L+1 (63%), H→L+2 (15%), H-1→L (3%), H-1→L+2 (6%), H→L (5%)                      |
| 3  | 582.113               | 2.130    | 0.080 | H→L+1 (14%), H→L+2 (66%), H-1→L+1 (6%), H-1→L+2 (2%), H-1→L+3 (5%)                |
| 4  | 545.825               | 2.272    | 0.077 | H-1→L (13%), H-1→L+1 (12%), H-1→L+3 (14%), H→L+1 (11%), H→L+3 (38%), H-2→L+1 (3%) |
| 5  | 523.317               | 2.369    | 0.061 | H-1→L (59%), H→L+3 (22%), H-1→L+1 (6%), H-1→L+3 (6%)                              |



|   |         |       |       |                                                                                                     |
|---|---------|-------|-------|-----------------------------------------------------------------------------------------------------|
| 6 | 515.655 | 2.404 | 0.613 | H-1→L (13%), H-1→L+1 (50%), H-2→L (5%), H→L (8%),<br>H→L+1 (3%), H→L+2 (3%), H→L+3 (8%), H→L+4 (7%) |
|---|---------|-------|-------|-----------------------------------------------------------------------------------------------------|

**Table S12:** Wavelength, excitation energy and oscillator strength of investigated compound **D7** in gas phase.

| NO | DFT<br>$\lambda$ (nm) | $E$ (eV) | $f$   | MO contributions                                                                                               |
|----|-----------------------|----------|-------|----------------------------------------------------------------------------------------------------------------|
| 1  | 691.953               | 1.791    | 3.708 | H→L (77%), H-1→L (3%), H-1→L+1 (4%), H→L+1 (6%),<br>H→L+2 (2%), H→L+4 (4%)                                     |
| 2  | 630.193               | 1.967    | 0.511 | H→L (11%), H→L+1 (66%), H-1→L (2%), H-1→L+1 (6%),<br>H-1→L+2 (3%), H→L+2 (7%)                                  |
| 3  | 603.858               | 2.053    | 0.080 | H→L+1 (10%), H→L+2 (72%), H-2→L+2 (3%), H-1→L+1<br>(3%), H-1→L+2 (7%)                                          |
| 4  | 563.488               | 2.200    | 0.106 | H-1→L (23%), H-1→L+1 (17%), H-1→L+3 (10%), H→L+3<br>(24%), H-2→L+1 (7%), H-2→L+3 (4%), H→L (2%), H→L+1<br>(5%) |
| 5  | 551.678               | 2.247    | 0.687 | H-1→L (32%), H-1→L+1 (25%), H→L+4 (10%), H-2→L<br>(8%), H-2→L+1 (2%), H→L (8%), H→L+1 (7%)                     |
| 6  | 546.258               | 2.270    | 0.400 | H-1→L (21%), H-1→L+1 (14%), H→L+3 (40%), H-1→L+3<br>(8%), H→L+1 (5%), H→L+4 (5%)                               |

**Table S13:** Wave length, excitation energy and oscillator strength of investigated compound **D1** in chloroform.

| NO | DFT<br>$\lambda$ (nm) | $E$ (eV) | $f$   | MO contributions                                                            |
|----|-----------------------|----------|-------|-----------------------------------------------------------------------------|
| 1  | 639.390               | 1.939    | 1.879 | H→L (86%), H-1→L+1 (3%), H→L+1 (8%)                                         |
| 2  | 577.288               | 2.148    | 0.155 | H→L+1 (65%), H→L+2 (16%), H-1→L (3%), H-1→L+2 (3%),<br>H→L (8%), H→L+3 (3%) |
| 3  | 535.176               | 2.317    | 0.480 | H→L+1 (17%), H→L+2 (67%), H-1→L+1 (5%), H-1→L+3 (2%),<br>H→L+3 (5%)         |
| 4  | 484.465               | 2.559    | 0.041 | H→L+3 (82%), H-1→L (3%), H-1→L+2 (3%), H→L+2 (6%)                           |
| 5  | 460.925               | 2.690    | 0.093 | H-1→L (72%), H-1→L+1 (9%), H→L (3%), H→L+1 (4%), H→L+2<br>(2%), H→L+3 (4%)  |
| 6  | 426.972               | 2.904    | 0.013 | H-1→L (15%), H-1→L+1 (51%), H-1→L+2 (13%), H-3→L (4%),<br>H→L+2 (5%)        |

**Table S14:** Wave length, excitation energy and oscillator strength of investigated compound **D2** in chloroform.

| NO | DFT<br>$\lambda$ (nm) | $E$ (eV) | $f$   | MO contributions                                                              |
|----|-----------------------|----------|-------|-------------------------------------------------------------------------------|
| 1  | 655.480               | 1.891    | 2.674 | H→L (85%), H-1→L+1 (5%), H→L+1 (8%)                                           |
| 2  | 592.659               | 2.092    | 0.265 | H→L+1 (66%), H-1→L (6%), H-1→L+2 (4%), H→L (7%), H→L+2 (7%), H→L+3 (6%)       |
| 3  | 562.108               | 2.206    | 0.391 | H→L+2 (67%), H-1→L+1 (8%), H-1→L+2 (5%), H-1→L+3 (3%), H→L+1 (8%), H→L+3 (5%) |
| 4  | 516.773               | 2.399    | 0.081 | H→L+3 (78%), H-1→L+2 (4%), H→L+1 (6%), H→L+2 (7%)                             |
| 5  | 492.001               | 2.520    | 0.163 | H-1→L (88%), H→L+1 (6%)                                                       |
| 6  | 463.787               | 2.673    | 0.025 | H-1→L+1 (65%), H→L+2 (14%), H-1→L+2 (9%), H→L (3%)                            |

**Table S15:** Wave length, excitation energy and oscillator strength of investigated compound **D3** in chloroform.

| N<br>O | DFT<br>$\lambda$ (nm) | $E$ (eV) | $f$    | MO contributions                                                  |
|--------|-----------------------|----------|--------|-------------------------------------------------------------------|
| 1      | 676.474               | 1.832    | 3.0738 | H→L (82%), H-1→L+1 (7%), HOMO→L+1 (8%)                            |
| 2      | 620.417               | 1.998    | 0.015  | H→L+1 (72%), H-1→L (9%), H-1→L+2 (5%), H→L (7%)                   |
| 3      | 586.602               | 2.114    | 0.574  | H→L+2 (76%), H-1→L+1 (8%), H-1→L+2 (2%), H-1→L+3 (6%), H→L+3 (4%) |
| 4      | 540.307               | 2.295    | 0.088  | H→L+3 (75%), H-1→L+2 (6%), H-1→L+3 (5%), H→L+1 (5%), H→L+2 (6%)   |
| 5      | 520.221               | 2.383    | 0.022  | H-1→L (82%), H→L (2%), H→L+1 (8%)                                 |
| 6      | 496.175               | 2.499    | 0.161  | H-1→L+1 (74%), H-2→L (2%), H→L (8%), H→L+2 (9%)                   |

**Table S16:** Wave length, excitation energy and oscillator strength of investigated compound **D5** in chloroform.

| NO | DFT<br>$\lambda$ (nm) | $E$ (eV) | $f$   | MO contributions                                                                             |
|----|-----------------------|----------|-------|----------------------------------------------------------------------------------------------|
| 1  | 708.521               | 1.749    | 3.395 | H→L (80%), H-1→L (3%), H-1→L+1 (5%), H→L+1 (5%), H→L+2 (3%)                                  |
| 2  | 650.494               | 1.906    | 0.276 | H-1→L+1 (11%), H→L+1 (68%), H-1→L (6%), H-1→L+2 (2%), H→L (7%)                               |
| 3  | 615.673               | 2.014    | 0.329 | H→L+2 (77%), H-2→L+2 (3%), H-1→L+1 (7%), H-1→L+2 (4%), H-1→L+3 (3%)                          |
| 4  | 572.279               | 2.167    | 0.171 | H-1→L+3 (14%), H→L+3 (55%), H-2→L+1 (2%), H-1→L+1 (8%), H-1→L+2 (4%), H→L+1 (7%), H→L+2 (3%) |
| 5  | 552.687               | 2.243    | 0.105 | H-1→L (42%), H-1→L+1 (22%), H→L+1 (14%), H→L+3 (12%), H-2→L+1 (3%), H-1→L+3 (3%)             |
| 6  | 539.766               | 2.297    | 0.438 | H-1→L (34%), H-1→L+1 (33%), H→L (10%), H-2→L (8%), H→L+1 (3%), H→L+2 (2%), H→L+3 (4%)        |

**Table S17:** Wave length, excitation energy and oscillator strength of investigated compound **D7** in chloroform.

| NO | DFT<br>$\lambda$ (nm) | $E$ (eV) | $f$   | MO contributions                                                                                          |
|----|-----------------------|----------|-------|-----------------------------------------------------------------------------------------------------------|
| 1  | 728.376               | 1.702    | 3.409 | H→L (75%), H-1→L (6%), H-1→L+1 (3%), H→L+1 (4%), H→L+2 (5%), H→L+4 (3%)                                   |
| 2  | 670.257               | 1.850    | 0.667 | H-1→L+1 (15%), H→L+1 (64%), H-2→L+1 (4%), H-1→L (3%), H→L (7%)                                            |
| 3  | 633.542               | 1.957    | 0.312 | H→L+2 (73%), H-2→L+2 (3%), H-1→L+1 (4%), H-1→L+2 (8%), H→L (3%)                                           |
| 4  | 591.951               | 2.095    | 0.110 | H-1→L+1 (21%), H-1→L+3 (10%), H→L+3 (32%), H-2→L+1 (9%), H-2→L+3 (3%), H-1→L (4%), H→L+1 (9%), H→L+2 (2%) |
| 5  | 579.122               | 2.141    | 0.044 | H-1→L (47%), H→L+3 (19%), H-2→L (6%), H-1→L+1 (5%), H-1→L+3 (6%), H→L (4%), H→L+1 (7%)                    |
| 6  | 575.520               | 2.154    | 0.961 | H-1→L (19%), H-1→L+1 (27%), H→L+1 (12%), H→L+3 (13%), H-2→L (6%), H-2→L+1 (3%), H→L (9%), H→L+4 (5%)      |

MO=molecular orbital, HOMO=H, LUMO=L,  $f$  = oscillator strength

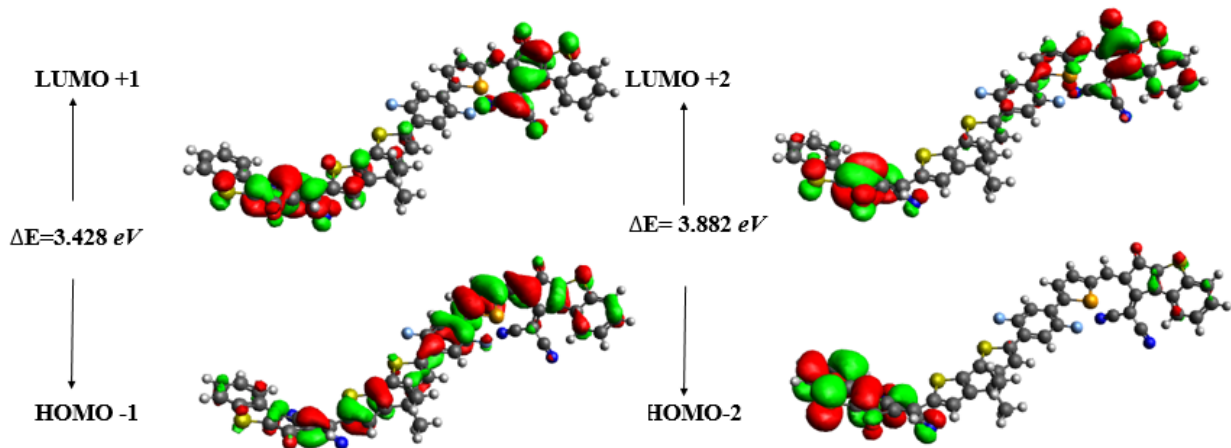

**Figure S1:** Frontier molecular orbitals of **D1**.

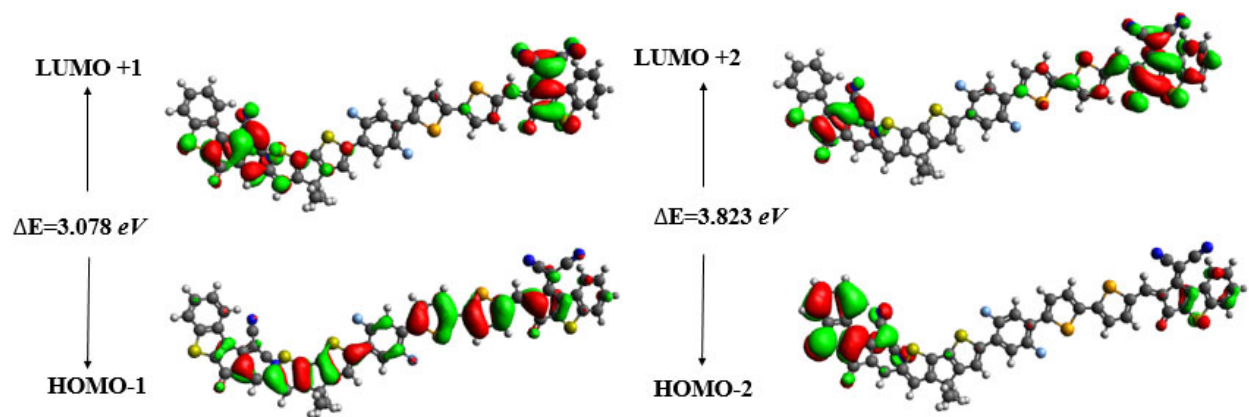

**Figure S2:** Frontier molecular orbitals of D2.

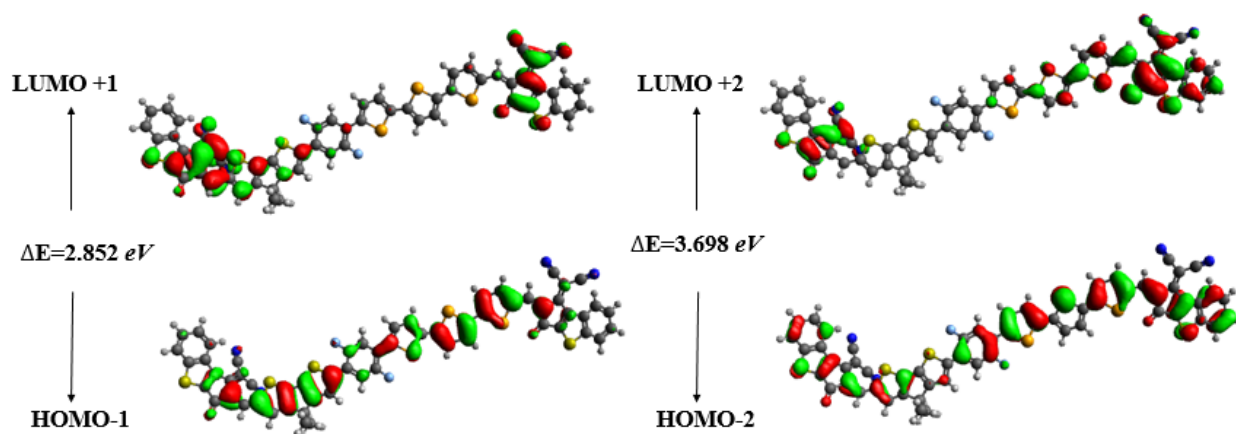

**Figure S3:** Frontier molecular orbitals of D3.

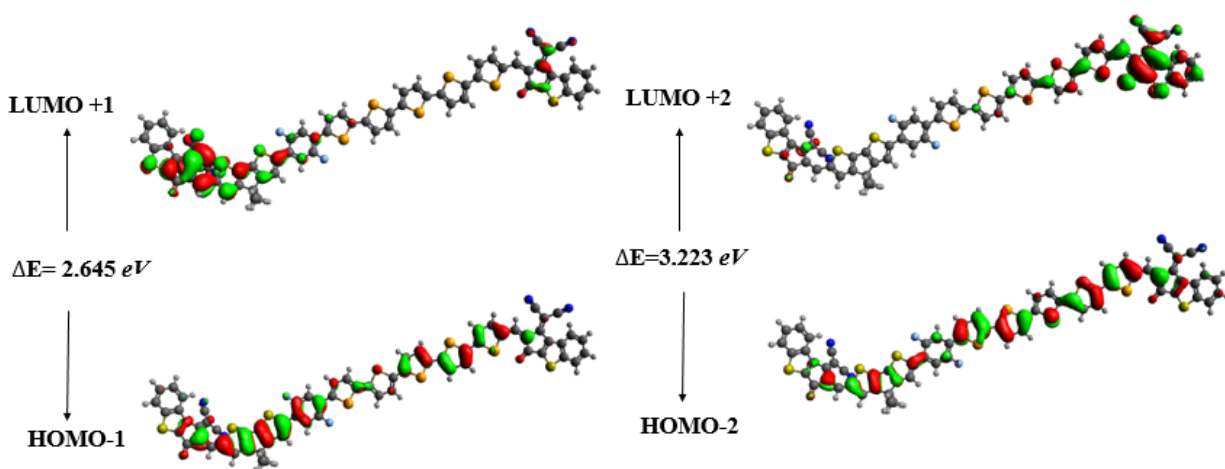

**Figure S4:** Frontier molecular orbitals of D5.

[illegible]

sepi-selenophen]-5-yl)methylene)-3-oxo-2,3-dihydro-1H-benzo[b]cyclopenta[d]thiophen-1-ylidene)malononitrile

**Acceptor-1:** 1,4-Difluoro-benzene

**Acceptor-2:** 2-(2-Methylene-3-oxo-2,3-dihydro-benzo[b]cyclopenta[d]thiophen-1-ylidene)-malononitrile

**$\pi$ -spacer-1:** 2-Methyl-selenophene

**$\pi$ -spacer-2:** 4-Isopropyl-2-methyl-4H-cyclopenta[2,1-b;3,4-b']dithiophene
